## THE EFFECT OF PROGRESSIVE HYPOXIA ON HEART RATE, VENTILATION, RESPIRATORY GAS EXCHANGE AND ACID-BASE STATUS IN THE CRAYFISH *AUSTROPOTAMOBIOUS PALLIPES*

By MICHÈLE G. WHEATLY AND E. W. TAYLOR

*Department of Zoology and Comparative Physiology  
University of Birmingham, Birmingham B15 2TT, U.K.*

(Received 24 July 1980)

### SUMMARY

1. Male and female crayfish, *Austropotamobius pallipes* (Lereboullet) maintained a constant rate of  $O_2$  uptake ( $\dot{M}_{O_2}$ ) during a progressive reduction in ambient  $O_2$  tension down to a critical tension ( $P_c$ ) of 40 mmHg at 15 °C.

2. Heart rate ( $f_H$ ) slowed progressively during hypoxia but blood flow was maintained by an increase in cardiac stroke volume.

3. At a  $P_{I,O_2}$  of 50 mmHg the rate of ventilation ( $\dot{V}_w$ ) had increased to 2.8 times the normoxic value. This was effected by a doubling in respiratory frequency ( $f_R$ ) accompanied by increases in both the mean amplitude of the pressure pulse and the mean hydrostatic pressure recorded in the branchial chambers. The effectiveness of removal of  $O_2$  from the water ventilating the gills was maintained ( $E_w$ ), and there is evidence that the ability of the respiratory surface to transfer  $O_2$  ( $T_{O_2}$ ) improved during hypoxia.

4. The hyperventilation enhanced  $CO_2$  elimination so that  $CO_2$  tensions were halved and respiratory alkalosis occurred in the haemolymph.

5. This alkalosis had the effect of increasing the affinity of the blood pigment for  $O_2$ , reducing the half saturation pressure ( $P_{50}$ ) from 8 to 4.5 mmHg. Thus despite reductions in pre- and postbranchial  $O_2$  tensions by 50% the arteriovenous  $O_2$  content difference was maintained and the effectiveness of removal of  $O_2$  into the blood ( $E_b$ ) remained high in moderately hypoxic water ( $P_{O_2}$  63 ± 1 mmHg).

6. At  $P_{I,O_2}$  levels below 40 mmHg, when crayfish were denied access to air, they were unable to sustain the hyperventilation. Haemolymph  $O_2$  content and the  $a-v$   $O_2$  content difference decreased, and as the haemolymph was no longer saturated with  $O_2$  on its passage through the gills,  $E_b$  was reduced. As a consequence of these changes  $\dot{M}_{O_2}$  fell.

7. Under these conditions a partial switch to anaerobic metabolism occurred, with lactic acid accumulating in the haemolymph. The resultant metabolic acidosis partially offset the respiratory alkalosis.

### INTRODUCTION

In a previous report it was established that *Austropotamobius pallipes* (Lereboullet), the common British crayfish, will migrate from hypoxic water into air when the ambient oxygen tension is lowered to a mean level of 42 ± 5 mmHg (Taylor &

Wheatly, 1980). A complete analysis of respiratory gas exchange and acid-base status has been presented for animals subjected to short- and long-term aerial exposure in comparison with settled crayfish submerged in normoxic water (see Taylor & Wheatly, 1980, 1981). However, as the behavioural migration into air was from a hypoxic environment, and water samples collected by divers from the refuges inhabited by crayfish indicated that the animals may routinely encounter moderate hypoxia (Wheatly, unpublished observations), it was considered useful to measure respiratory gas exchange and blood gas variables during progressive hypoxia and to relate them to the changes associated with the migration into air.

The response of animals to varying levels of induced hypoxia has been the subject of numerous investigations. Hill (1976) in a review of the field stated that as the environmental  $O_2$  tension falls animals can either experience a continuous reduction in  $O_2$  uptake (i.e. conform to the change) or maintain  $O_2$  uptake at the normoxic level down to low  $O_2$  tensions (i.e. regulate against the change). In crustaceans it has been recorded that  $O_2$  uptake varies with the available  $O_2$  over a wide range of tensions in *Homarus americanus* (Amberson, Mayerson & Scott, 1924), *Homarus vulgaris* (Thomas, 1953) *Procambarus simulans* (Larimer & Gold, 1961) and *Orconectes immunis* (Wiens & Armitage, 1961): i.e. they are  $O_2$  conformers. Other authors maintain that species such as *Cancer magister* (Johansen, Lenfant & Mecklenberg, 1970), *Panulirus interruptus* (Winget, 1969) and *Carcinus maenas* (Taylor, Butler & Al-Wassia, 1977b) can regulate  $O_2$  uptake down to low levels of  $P_{O_2}$ , i.e. they are  $O_2$  regulators.

However, the situation is complicated by a number of factors such as acclimation temperature and activity levels. Thus a species may conform at high environmental temperatures but regulate at lower temperatures (Spitzer, Marvin & Heath, 1969; Butler & Taylor, 1975). Likewise Thomas (1954) observed conformation in restrained lobsters whereas Spoek (1974) at the same temperature found regulation down to tensions as low as 30 mmHg. The degree of regulation depends also on the duration of hypoxia and the rate at which it is induced (McMahon, Burggren & Wilkens, 1974; Butler, Taylor & McMahon, 1978).

Ventilatory flow rate ( $\dot{V}_w$ ) of aquatic animals is very much influenced by variations in water oxygenation. Fox & Johnson (1934) and Lindroth (1938) have observed in crustaceans that  $f_H$  is inversely related to oxygenation levels. Enhanced  $\dot{V}_w$  during hypoxia has been measured directly by Arudpragasam & Naylor (1964), Taylor, Butler & Al-Wassia (1977b), Butler *et al.* (1978) and McMahon *et al.* (1974).

Similarly, perfusion of the respiratory organs with blood or haemolymph may vary during hypoxia. Heart rate ( $f_H$ ) is generally either maintained constant (e.g. *Homarus* – Butler *et al.* 1978) or exhibits a bradycardia (e.g. *Carcinus* – Taylor, Butler & Sherlock, 1973). A reduction in  $f_H$  does not necessarily indicate reduced blood flow, however, as in some fish the perfusion volume is maintained despite the bradycardia by an increase in stroke volume (Holeton & Randall, 1967; Short, Taylor & Butler, 1979) and a similar mechanism was suggested to account for an apparent increase in perfusion during aerial exposure in *Carcinus* (Taylor & Butler, 1978).

The responses to hypoxia, which are primarily aimed at maintaining adequate oxygenation of the blood, will inevitably lead to changes in the acid-base balance.

■ This approach to the response is more recent and innovative. Dejours & Beekenkamp (1977), Truchot (1975) and McMahon, Butler & Taylor (1978) have all studied the effect of various levels of hypoxia on acid-base status in decapodan crustaceans. The general observation is that the hyperventilation, which serves to maintain  $O_2$  supply from depleted water, also enhances  $CO_2$  excretion at the gill surface, effecting a reduction in  $CO_2$  tension and a concomitant alkalosis. The reverse situation is found in conditions of hyperoxia (Dejours & Beekenkamp, 1977).

It must also be appreciated that in the face of exposure to severe hypoxia, crustaceans may possess the facility to maintain metabolic rate by switching to anaerobic metabolism. This has been substantiated by Butler *et al.* (1978) and Spoek (1974).

The aim of the present investigation was to make a complete assessment of respiratory and cardiovascular physiology, blood gas analysis and the relative performance of the gas-exchange system during short-term progressive hypoxia in the crayfish *A. pallipes*, in order to assess the respiratory performance of the submerged animal prior to the migration into air described by Taylor & Wheatly (1980).

#### MATERIALS AND METHODS

The present report contains observations on 35 specimens of the common British crayfish *Austropotamobius pallipes* (Lereboullet) of either sex. The animals were collected and maintained as previously described (Taylor & Wheatly, 1980, 1981). Ventilation, heart rate and blood gas variables were measured using a series of techniques described in earlier reports.

Rate of oxygen consumption ( $\dot{M}_{O_2}$ ) of crayfish during progressive hypoxia was measured using the same continuous-flow respirometer as described by Taylor *et al.* (1977a). Rate of gill ventilation ( $\dot{V}_w$ ) was measured as described by Butler *et al.* (1978) by positioning an open-ended mask in front of both exhalant openings to enable sampling of the  $O_2$  tension of mixed expired water, which together with the  $P_{O_2}$  of the inspired water and rate of  $O_2$  consumption enables the calculation of branchial ventilation via the Fick principle. Respiratory frequency ( $f_R$ ) was recorded as fluctuations in the hydrostatic pressure associated with ventilation by the scaphognathite (see Taylor *et al.* 1973; Butler *et al.* 1978), and heart rate ( $f_H$ ) was measured as the electrocardiogram by means of a pair of stainless steel wires inserted through the carapace above the heart (cf. Taylor *et al.* 1977a). Samples of prebranchial haemolymph were withdrawn from the base of a walking leg and postbranchial samples were withdrawn from the pericardial sinus surrounding the heart (Butler *et al.* 1978), and were used for the measurement of oxygen tension ( $P_{v,O_2}$ ,  $P_{a,O_2}$ ) oxygen content ( $C_{v,O_2}$ ,  $C_{a,O_2}$ ) total  $CO_2$  ( $\Sigma_{v,CO_2}$ ,  $\Sigma_{a,CO_2}$ ) and pH ( $pH_v$ ,  $pH_a$ ) using standard techniques (Taylor & Wheatly, 1979). Values for  $CO_2$  tension ( $P_{v,CO_2}$ ,  $P_{a,CO_2}$ ) were calculated from the measured values for  $\Sigma_{CO_2}$  and pH via the Henderson-Hasselbalch equation as described by McMahon *et al.* (1978). Haemolymph lactate levels were measured on samples of mixed pre- and postbranchial haemolymph (Taylor *et al.* 1977b).

Respiratory and cardiovascular variables were measured with progressive reduction

$O_2$  tension from settled normoxic levels, measured after 18 h in the experimental chamber (Taylor & Wheatly, 1980), down to approximately 30 mmHg, reducing the

inspired  $O_2$  tension in 7–8 steps of 15–30 mmHg at 90 min intervals, since it proved impossible to obtain specific values for  $P_{I,O_2}$ . Values of any variable at 10 mmHg intervals of  $P_{I,O_2}$  between 140 mmHg and 30 mmHg were then obtained for each animal by linear interpolation on  $O_2$  dependency curves for individual animals, and this enabled the construction of a mean curve for the effect of progressive hypoxia on the chosen variable (cf. Butler & Taylor, 1975).

Blood gas analysis was performed on two groups of animals at  $O_2$  tensions either above or just below the critical  $O_2$  tension ( $P_c$ ) for  $O_2$  uptake. These have been compared with the settled normoxic blood gas values previously obtained (Taylor & Wheatly, 1980).

The relative performance of the respiratory gas exchange system of the crayfish during progressive hypoxia has been assessed using the established criteria recently described by Short *et al.* (1979). In this final analysis, the values for the respiratory and cardiovascular variables under normoxic conditions, and at the two levels of hypoxia at which blood gas analysis was performed, were interpolated from the average curves. Thus these derived indices have been computed on mean values and cannot be accompanied by any indication of variability.

Directly measured variables are expressed throughout as mean values  $\pm$  S.E.M. with the number of observations in parentheses ( $n$ ). Differences between mean values were subjected to Student's  $t$  test and significant differences assigned at a confidence level of 95 %

## RESULTS

### (1) *The respiratory and cardiovascular changes associated with progressive hypoxia*

#### (a) *Rate of oxygen uptake ( $\dot{M}_{O_2}$ )*

The rate of oxygen uptake ( $\dot{M}_{O_2}$ ) was measured for 7 animals of mean mass  $61.6 \pm 3.7$  g (range 49–80 g) at progressively reduced  $O_2$  tensions and is illustrated, together with other respiratory and cardiovascular variables, in Fig. 1. The mean settled level of  $O_2$  uptake for these animals was  $11.2 \pm 1.6 \mu\text{mol kg}^{-1} \text{min}^{-1}$ . As inspired  $O_2$  tension was progressively reduced there was a slight, though insignificant rise in the  $O_2$  uptake down to a level of 70 mmHg. Further reduction caused a drop in  $\dot{M}_{O_2}$  below 50 mmHg, which became significantly different from the settled normoxic value at a  $P_{I,O_2}$  of 40 mmHg, by which time it had fallen to 44 % of its initial value. Animals were consistent in their degree of variability about the mean value throughout the experiment.

#### (b) *Rate of branchial ventilation ( $\dot{V}_w$ )*

The rate of branchial ventilation of these same 7 animals settled in normoxic water was  $96 \pm 9 \text{ ml kg}^{-1} \text{min}^{-1}$ . As the  $P_{I,O_2}$  was progressively lowered, rate of branchial ventilation increased, until by 80 mmHg the level was significantly raised to almost double the settled level. With further progressive hypoxia, the branchial ventilation rate continued to rise until it reached a maximum level at 50 mmHg of  $266 \pm 48 \text{ ml kg}^{-1} \text{min}^{-1}$ , which was almost a threefold increase above the settled level. This increase, however, was not sustained with further reduction in  $P_{I,O_2}$ , and at values below 50 mmHg there was a progressive reduction in the rate of branchial ventilation returning it to the normoxic level (Fig. 1).

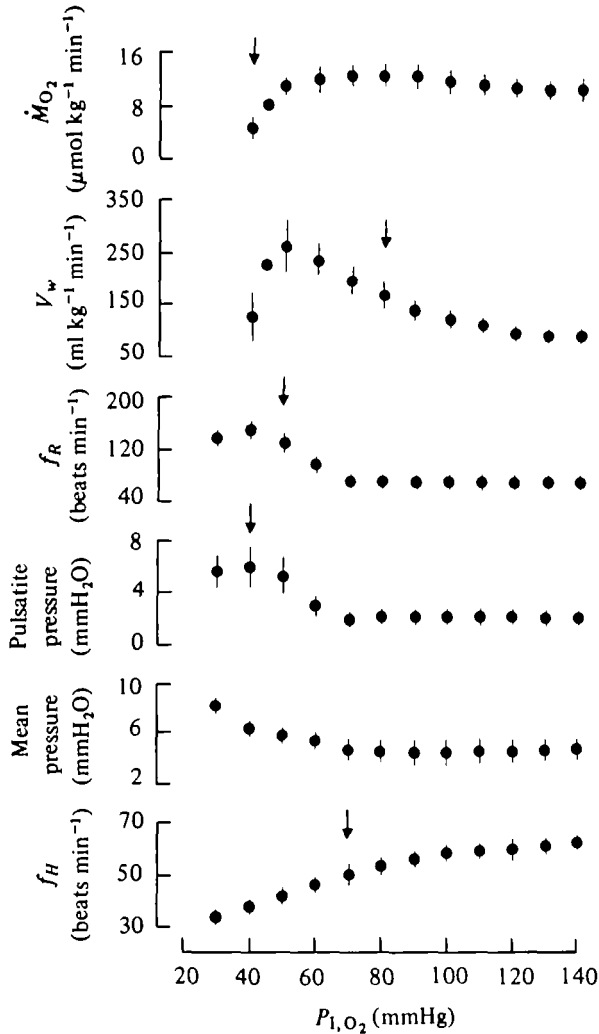

Fig. 1. Changes in the mean values ( $\pm$  S.E. of mean) of rate of oxygen consumption ( $\dot{M}_{O_2}$ ), ventilation rate ( $\dot{V}_w$ ), rate of scaphognathite movements ( $f_R$ ), pulsatile pressure and mean hydrostatic pressure generated in the branchial chambers by the action of the scaphognathite, and heart rate ( $f_H$ ), from a crayfish submerged in water at 15 °C which was rendered progressively hypoxic in a series of 8 steps over a 12 h period. The arrows indicate the hypoxic  $P_{O_2}$  value at which the measured mean varied significantly from the mean level at a  $P_{O_2}$  of 140 mmHg ( $P < 0.05$ ).

### (c) Respiratory frequency and pressures generated in the branchial chamber

The observed changes in rate of branchial ventilation during progressive hypoxia were reflected in measurements made on 6 animals of mass  $40.4 \pm 3.8$  g (range 29.8–52.3 g) with respect to  $f_R$  and the pressures generated in the branchial chambers (Fig. 1).

The settled  $f_R$  was  $74 \pm 6$  beats  $\text{min}^{-1}$ . During progressive hypoxia  $f_R$  stayed relatively constant until an inspired  $O_2$  tension of 70 mmHg and thereafter began to rise. It first reached a level significantly above the settled rate at 50 mmHg and peaked at a  $P_{I,O_2}$  of 40 mmHg, by which time the rate was  $152 \pm 13(6)$  which constituted a doubling of the initial rate. Further reduction in  $O_2$  tension evoked a

slight fall in the mean  $f_R$ , which however, remained significantly elevated in comparison with the normoxic level.

Concomitant with this observed rise in  $f_R$  at declining  $O_2$  tensions were increases in both the mean amplitude of the pressure pulse and the mean pressure recorded in the branchial chambers. Under normoxic conditions the pulsatile pressure was  $2.10 \pm 0.44$  mmH<sub>2</sub>O, which remained relatively constant with  $P_{I,O_2}$  reductions down to 70 mmHg. A gradual increase was then observed which first became significant at a  $P_{I,O_2}$  of 40 mmHg and remained elevated with further reductions in  $P_{O_2}$  at three times the initial value.

The mean pressure recorded in the branchial chamber under normoxic conditions was  $4.68 \pm 0.85$  mmH<sub>2</sub>O below ambient hydrostatic pressure. Like pulsatile pressure, this was maintained down to 70 mmHg, and thereafter increased in magnitude down to 30 mmHg, when the level recorded was double that in settled animals. However, despite this apparent increase in mean pressure, animals exhibited such variability about the mean level that at no point was the increase significant.

#### (d) Heart rate ( $f_H$ )

Measurements of  $f_H$  were made on 6 animals of mass  $37.7 \pm 3.4$  g (range 24.8–45.0 g). The mean settled level recorded during normoxia was  $63 \pm 3$  beats min<sup>-1</sup>. This decreased at a fairly constant rate down to an inspired  $O_2$  tension of about 90 mmHg, at which point the rate of induction of the bradycardia increased. The level first became significantly reduced at a  $P_{I,O_2}$  of 70 mmHg, when it was 80% of its initial value. Heart rate continued to decrease proportionately until at 30 mmHg it was reduced to half its initial value (Fig. 1).

The values for these variables at  $P_{I,O_2}$  values of 145, 63 and 36 mmHg, which were the mean  $P_{I,O_2}$  levels at which blood gas analysis was conducted, have been interpolated from the appropriate graphs and are given, together with the relevant blood gas values, in Table 1.

### (2) Blood gas analysis and determination of acid-base status during progressive hypoxia

Having ascertained that the critical  $O_2$  tension for maintenance of  $O_2$  uptake was 40 mmHg, it was decided to investigate blood gas analysis below and above this critical level. Experiments were therefore conducted on 8 animals of mean mass 37.9 g (range 25.5–48.0 g) at a mean  $P_{I,O_2}$  of  $63 \pm 1$  mmHg, by which stage rate of branchial ventilation would be elevated and cardiac frequency reduced; and on another 8 animals of mean mass 30.1 g (range 14.5–43.4 g) at a mean  $P_{I,O_2}$  of  $36 \pm 2$  mmHg, by which stage  $\dot{M}_{O_2}$ ,  $\dot{V}_w$ ,  $f_R$  and  $f_H$  were all reduced, indicating that respiratory gas exchange may be limited. These values are compared with the normoxic values previously obtained from settled submerged animals by Taylor & Wheatly (1980) in Table 1).

#### (a) $O_2$ tension and content

A progressive reduction in inspired  $O_2$  tension caused a progressive reduction in the tension of both post- and prebranchial haemolymph. These variations are indicated along with  $O_2$  content values and the arteriovenous  $O_2$  ( $a-v O_2$ ) content

Table 1. Values for directly measured and derived variables of respiratory gas exchange and acid-base balance from crayfish settled in normoxic water and under conditions of environmental hypoxia at mean inspired  $O_2$  tensions of  $63 \pm 1$  and  $36 \pm 2$  mmHg.

(Most are mean values  $\pm$  s.e. of mean with number of observations in parentheses. \* denotes significant differences from normoxic values ( $P < 0.05$ ); <sup>b</sup> denotes interpolation from mean  $O_2$  dependency curves; <sup>c</sup> denotes calculation from mean values.

| Variable                                                    | Normoxic water,<br>$P_{I,O_2}$ 145 mmHg | Hypoxic water, $P_{I,O_2}$ |                       |
|-------------------------------------------------------------|-----------------------------------------|----------------------------|-----------------------|
|                                                             |                                         | $63 \pm 1$ mmHg            | $36 \pm 2$ mmHg       |
| Directly measured variables                                 |                                         |                            |                       |
| $\dot{M}_{O_2}$ ( $\mu\text{mol kg}^{-1} \text{min}^{-1}$ ) | 11.2 <sup>b</sup>                       | 12.7 <sup>b</sup>          | 4.9 <sup>b</sup>      |
| $f_H$ (beats min <sup>-1</sup> )                            | 63 <sup>b</sup>                         | 48 <sup>b</sup>            | 36 <sup>b</sup>       |
| $f_R$ (beats min <sup>-1</sup> )                            | 74 <sup>b</sup>                         | 88 <sup>b</sup>            | 148 <sup>b</sup>      |
| $P_{I,O_2}$ (mmHg)                                          | 145 <sup>b</sup>                        | 63 <sup>b</sup>            | 36 <sup>b</sup>       |
| $P_{R,O_2}$ (mmHg)                                          | 88 <sup>c</sup>                         | 36 <sup>c</sup>            | 17 <sup>c</sup>       |
| $P_{a,O_2}$ (mmHg)                                          | 33 $\pm$ 5(5)                           | 13 $\pm$ 2(8)*             | 8 $\pm$ 1(6)*         |
| $P_{v,O_2}$ (mmHg)                                          | 17 $\pm$ 2(5)                           | 6 $\pm$ 2(8)*              | 4 $\pm$ 1(4)*         |
| $C_{a,O_2}$ (mmol l <sup>-1</sup> )                         | 0.33 $\pm$ 0.04(9)                      | 0.37 $\pm$ 0.02(9)         | 0.17 $\pm$ 0.03(6)*   |
| $C_{v,O_2}$ (mmol l <sup>-1</sup> )                         | 0.18 $\pm$ 0.03(9)                      | 0.19 $\pm$ 0.02(8)         | 0.09 $\pm$ 0.01(8)*   |
| pH <sub>a</sub>                                             | 7.896 $\pm$ 0.024(9)                    | 7.964 $\pm$ 0.034(8)       | 7.982 $\pm$ 0.027(8)* |
| pH <sub>v</sub>                                             | 7.861 $\pm$ 0.011(9)                    | 7.927 $\pm$ 0.033(8)       | 7.949 $\pm$ 0.049(8)  |
| $\Sigma_{a,CO_2}$ (mmol l <sup>-1</sup> )                   | 7.10 $\pm$ 0.40(9)                      | 4.90 $\pm$ 0.49(8)*        | 4.23 $\pm$ 0.49(8)*   |
| $\Sigma_{v,CO_2}$ (mmol l <sup>-1</sup> )                   | 7.68 $\pm$ 0.56(9)                      | 5.08 $\pm$ 0.57(8)*        | 4.45 $\pm$ 0.52(8)*   |
| Lactate (mmol l <sup>-1</sup> )                             | 0.40 $\pm$ 0.56(6)                      | 0.49 $\pm$ 0.03(7)         | 0.97 $\pm$ 0.13(8)*   |
| Derived via the Henderson-Hasselbalch equation              |                                         |                            |                       |
| $P_{a,CO_2}$ (mmHg)                                         | 3.03 $\pm$ 0.24(9)                      | 1.73 $\pm$ 0.07(8)*        | 1.45 $\pm$ 0.15(8)*   |
| $P_{v,CO_2}$ (mmHg)                                         | 3.53 $\pm$ 0.28(9)                      | 1.95 $\pm$ 14(8)*          | 1.67 $\pm$ 19(8)*     |
| Derived via the Fick equation                               |                                         |                            |                       |
| $\dot{V}_w$ (ml kg <sup>-1</sup> min <sup>-1</sup> )        | 96 <sup>b</sup>                         | 230 <sup>b</sup>           | 128 <sup>b</sup>      |
| $\dot{V}_g$ ml kg <sup>-1</sup> min <sup>-1</sup> )         | 74 <sup>c</sup>                         | 71 <sup>c</sup>            | 58 <sup>c</sup>       |
| Resp. stroke vol. (ml kg <sup>-1</sup> )                    | 1.30 <sup>c</sup>                       | 2.61 <sup>c</sup>          | 0.86 <sup>c</sup>     |
| Card. stroke vol. (ml. kg <sup>-1</sup> )                   | 1.17 <sup>c</sup>                       | 1.48 <sup>c</sup>          | 1.61 <sup>c</sup>     |

difference in Fig. 2. At a  $P_{I,O_2}$  of  $63 \pm 1$  mmHg both arterial and venous tensions were significantly reduced to less than half the normoxic values. By  $36 \pm 2$  mmHg a further significant reduction had occurred, so that post- and prebranchial levels had reached 23 and 20% respectively of their settled normoxic levels, which reflects the percentage drop in  $O_2$  tension of the inspired water that has occurred by this stage.

This situation is not mirrored in the  $O_2$  content values. At a mean  $P_{I,O_2}$  of 63 mmHg both  $C_{a,O_2}$  and  $C_{v,O_2}$  were somewhat elevated, though not significantly ( $P = 0.2-0.1$  and  $0.8-0.7$  respectively) with the net result that at this level of hypoxia the  $a-v$   $O_2$  content difference was maintained above the settled normoxic level. This may provide for the slight elevation in  $\dot{M}_{O_2}$  at this point. However, at a  $P_{I,O_2}$  of  $36 \pm 2$  mmHg, the marked reduction in  $P_{a,O_2}$ ,  $\dot{V}_w$ , and concomitantly  $\dot{M}_{O_2}$ , was reflected in marked reductions in  $C_{a,O_2}$  and  $C_{v,O_2}$  to 54 and 52% of their settled normoxic levels ( $P < 0.001$  in both cases). This resulted ultimately in a reduction in  $a-v$   $O_2$  content difference to 0.2 vol %, which is a reduction of 40% from the settled normoxic value, and proves to be just significant.

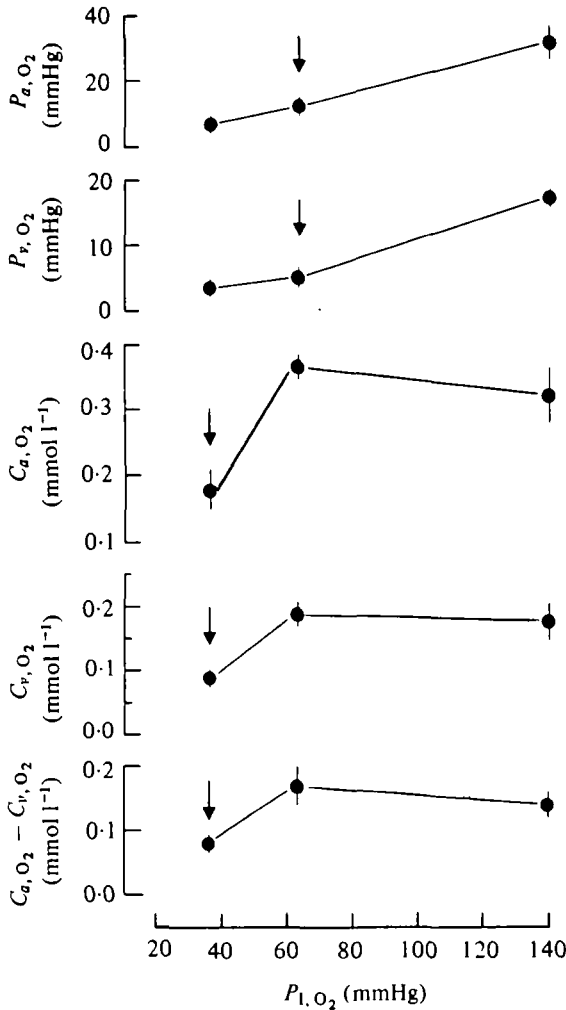

Fig. 2. Changes in the mean values ( $\pm$  s.e. of mean) of oxygen tension ( $P_{a,O_2}$  and  $P_{v,O_2}$ ), oxygen content ( $C_{a,O_2}$  and  $C_{v,O_2}$ ) and oxygen content difference ( $C_{a,O_2} - C_{v,O_2}$ ), of postbranchial and prebranchial haemolymph from crayfish submerged in normoxic water and following 3 h exposure to 2 levels of hypoxia ( $63 \pm 1$  mmHg or  $36 \pm 2$  mmHg). The arrows indicate the  $P_{O_2}$  at which the variable was significantly reduced from the normoxic level ( $P < 0.05$ ).

### (b) Acid-base status

The acid-base status during progressive hypoxia is summarized for post- and prebranchial haemolymph in a  $HCO_3^-$ /pH diagram (Fig. 3) and individual post-branchial variables are shown with progressive hypoxia in Fig. 4. Presumably because of the resultant hyperventilation, hypoxia was associated with significant reductions in  $CO_2$  tension. At a  $P_{I,O_2}$  of 63 mmHg the  $P_{CO_2}$  values in pre- and post-branchial haemolymph were reduced to 56% of their normoxic values, and with a further reduction in  $P_{I,O_2}$  to 36 mmHg they showed a further slight reduction to 48% of their initial values. The total  $CO_2$  content of the haemolymph was significantly lowered. Examination of levels of  $[HCO_3^-]$ ,  $[CO_3^{2-}]$  and dissolved  $CO_2$  indicate that reductions occurred in all three moieties during progressive hypoxia.  $[HCO_3^-]$  levels



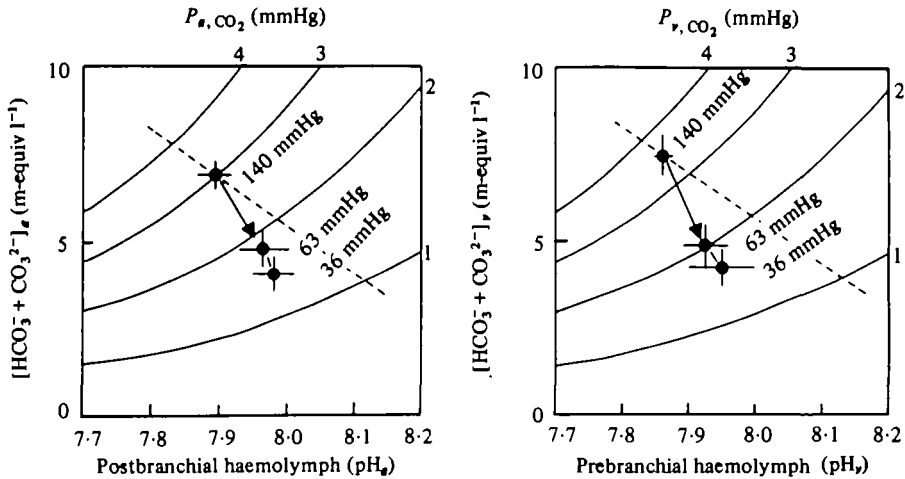

Fig. 3. Variation in mean pH and  $[\text{HCO}_3^- + \text{CO}_3^{2-}]$  levels ( $\pm$  s.e. of mean) in the postbranchial and prebranchial haemolymph of crayfish following exposure to the 3 levels of oxygen tension indicated beside each point. The thin continuous lines are isopleths for  $P_{\text{CO}_2}$  levels over the range of variation observed. The oblique broken line traces the buffer line calculated from two *in vitro* pH and  $[\text{HCO}_3^-]$  measurements at different  $P_{\text{CO}_2}$  levels.

were reduced by 40% and dissolved  $\text{CO}_2$  by 53%, both reductions being significant.  $[\text{CO}_3^{2-}]$  also exhibited a slight reduction to about 74% of its initial level. These changes in  $\text{CO}_2$  levels were associated with a significant respiratory alkalosis in the haemolymph (see Table 1 and Fig. 3).

### (c) Lactic acid accumulation

The possibility that the crayfish resorts to anaerobiosis under conditions of hypoxia was investigated on these same two groups of animals at mean  $P_{\text{I},\text{O}_2}$  of  $63 \pm 1$  and  $36 \pm 2$  mmHg. Lactic acid concentration in settled normoxic conditions was  $0.40 \pm 0.05$  mmol l<sup>-1</sup>. By the time the ambient  $\text{O}_2$  tension had been lowered to 63 mmHg there was a slight though insignificant rise in circulating lactic acid to  $0.49 \pm 0.03$  mmol l<sup>-1</sup>. However, with a further reduction in  $P_{\text{I},\text{O}_2}$  to 36 mmHg the lactate level rose to 2.4 times its initial normoxic value, which was a significant increase. It is possible that a metabolic acidosis arising from the accumulation of lactate during hypoxia may counteract the respiratory alkalosis which results from hyperventilation, thus explaining the deviation of the measured values from the buffer line for  $\text{CO}_2$  on Fig. 3.

### (3) The effect of progressive hypoxia on the $\text{O}_2$ combining properties of the haemolymph

The effect of the alkalosis experienced in the haemolymph on the  $\text{O}_2$ -combining properties of the blood pigment was assessed by construction of an *in vivo*  $\text{O}_2$  equilibrium curve. For this purpose post- and prebranchial values were combined for both levels of hypoxia since statistical analysis demonstrated that the pH levels were not significantly different and that the mean pH of the combined data was  $7.956 \pm 0.018$  ( $n = 23$ ). The  $\text{O}_2$  content was related to  $\text{O}_2$  tension for each individual sample of haemolymph and the resultant *in vivo* curve is illustrated (Fig. 5). The half saturation pressure ( $P_{50}$ ) of this curve was 4.5 mmHg, which represents an increase in  $\text{O}_2$

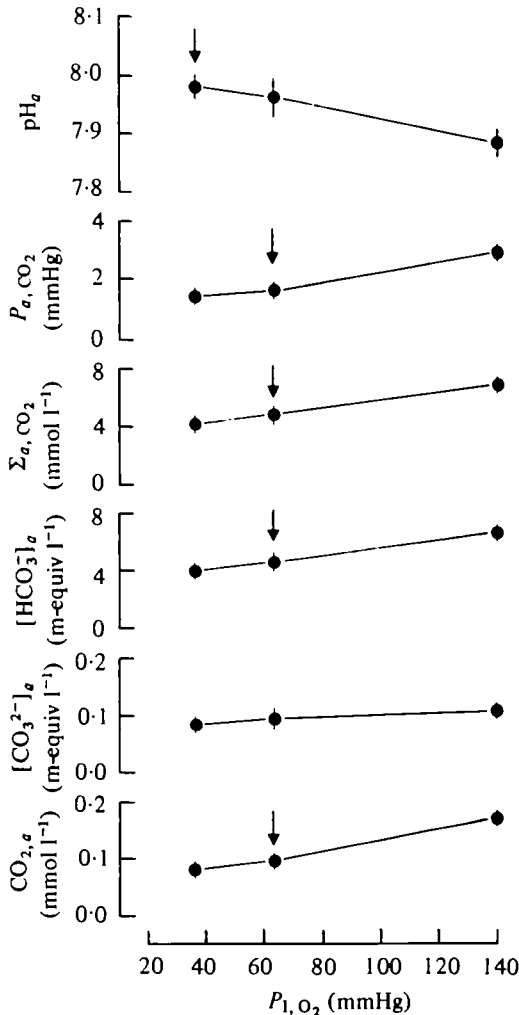

Fig. 4. Changes in the mean values ( $\pm$  s.e. of mean) of the factors governing acid-base status in the post branchial haemolymph of crayfish exposed to 3 levels of oxygen tension. The traces are, from above downwards:  $pH_a$ ;  $P_{a,CO_2}$ ;  $\Sigma_{a,CO_2}$  (total  $CO_2$  measured by acidifying samples of haemolymph);  $[HCO_3^-]_a$  (concentration of bicarbonate ions);  $[CO_3^{2-}]_a$  (concentration of carbonate ions) and  $CO_{2,a}$  (dissolved  $CO_2$ ). The arrows indicate the  $P_{O_2}$  at which the variable deviated significantly from the mean normoxic value.

affinity of the pigment when compared with the  $P_{50}$  of 8 mmHg, measured at the pH of the haemolymph from animals in normoxic water (Taylor & Wheatly, 1981).

#### (4) *Relative performance of the respiratory gas exchange system during progressive hypoxia*

The derived indices describing respiratory gas exchange during progressive hypoxia in the crayfish are given in Table 2. Again the values have been calculated for the two levels of hypoxia which were induced, that is  $63 \pm 1$  mmHg and  $36 \pm 2$  mmHg, and are compared with normoxic values.

It has already been noted that  $\dot{V}_w$  increased considerably during hypoxia. Down to a  $P_{I,O_2}$  of 63 mmHg this was manifested by increases in  $f_R$  and stroke volum

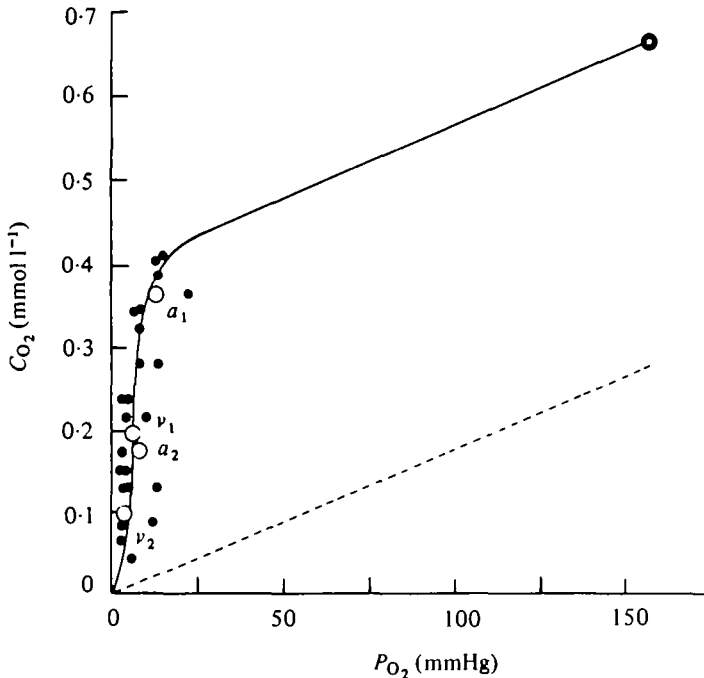

Fig. 5. The *in vivo* oxygen equilibrium curve for crayfish haemolymph collected from animals exposed to two levels of oxygen tension. The filled symbols are individual measurements, the open symbols denote mean  $O_2$  tension and content values from postbranchial ( $a_1$  and  $a_2$ ) and prebranchial ( $v_1$  and  $v_2$ ) haemolymph samples taken from animals exposed to mean  $P_{I,O_2}$  levels of  $63 \pm 1$  mmHg ( $a_1$  and  $v_1$ ) and 36 mmHg ( $a_2$  and  $v_2$ ). The starred symbol is a value for haemolymph equilibrated *in vitro* with a gas mixture having a  $P_{O_2}$  of 152 mmHg. The broken line indicates the dissolved  $O_2$  content of the haemolymph at 15 °C.

Table 2. The derived indices describing respiratory gas exchange in the crayfish submerged in normoxic water and at two levels of hypoxia at 15 °C

The derivation and possible significance of these indices have recently been described by Dejours (1975) and Short *et al.* (1979).

| $P_{I,O_2}$<br>(mmHg) | $\dot{V}_w$<br>(ml kg <sup>-1</sup> min <sup>-1</sup> ) | $\dot{V}_b$<br>(ml kg <sup>-1</sup> min <sup>-1</sup> ) | $\dot{V}_w/\dot{V}_b$ | $\dot{V}_w/\dot{M}_{O_2}$<br>(ml μ <sup>-1</sup> mol <sup>-1</sup> ) | $\dot{V}_b/\dot{M}_{O_2}$<br>(ml μ <sup>-1</sup> mol <sup>-1</sup> ) | Extraction (%) | $E_w$<br>(%) | $E_b$<br>(%) | $C_{a,O_2} - C_{v,O_2}$<br>(mmol l <sup>-1</sup> ) | $\Delta P_g$<br>(mmHg) | $T_{O_2}$<br>(μ <sup>-1</sup> mol kg <sup>-1</sup> min <sup>-1</sup> mmHg <sup>-1</sup> ) |
|-----------------------|---------------------------------------------------------|---------------------------------------------------------|-----------------------|----------------------------------------------------------------------|----------------------------------------------------------------------|----------------|--------------|--------------|----------------------------------------------------|------------------------|-------------------------------------------------------------------------------------------|
| Normoxia<br>40 mmHg   | 96                                                      | 74                                                      | 1.30                  | 8.57                                                                 | 6.61                                                                 | 39.3           | 44.6         | 70.0         | 0.15                                               | 91.7                   | 0.122                                                                                     |
| Hypoxia<br>3 ± 1 mmHg | 230                                                     | 71                                                      | 3.24                  | 18.11                                                                | 5.59                                                                 | 42.9           | 47.5         | 56.3         | 0.18                                               | 39.9                   | 0.318                                                                                     |
| Hypoxia<br>6 ± 2 mmHg | 128                                                     | 58                                                      | 2.21                  | 26.12                                                                | 11.84                                                                | 52.2           | 58.7         | 22.7         | 0.08                                               | 20.6                   | 0.238                                                                                     |

Thereafter  $\dot{V}_w$  decreased slightly, though to a level still above the normoxic level. Although  $f_R$  was further elevated at this time it was accompanied by a reduction in respiratory stroke volume. Rate of perfusion ( $\dot{V}_b$ ) appeared to remain constant at least until 63 mmHg as calculated from the maintained levels of  $\dot{M}_{O_2}$  and  $a-vO_2$  content difference. This was accomplished by an increase in cardiac stroke volume, since  $f_H$  was markedly reduced at this stage. Further reductions in  $P_{I,O_2}$ , however,

caused a decrease in  $\dot{V}_b$ , and cardiac stroke volume declined with progressive bradycardia. The outcome of these observed changes was that ventilation/perfusion ratio increased during hypoxia. At 63 mmHg this was by virtue of an elevation in  $\dot{V}_w$ . At 36 mmHg the ratio was reduced, but still higher than the normoxic value, despite the reduction in  $\dot{V}_w$ , by virtue of a proportionate reduction in  $\dot{V}_b$ .

The convection requirement for water increased during hypoxia. At moderately hypoxic levels the convection requirement increased because  $\dot{M}_{O_2}$  was maintained despite the reduction in  $O_2$  availability by virtue of the increase in  $\dot{V}_w$ . It rose still further at severely hypoxic levels despite the drop in  $\dot{V}_w$  because  $\dot{M}_{O_2}$  had similarly decreased. The convection requirement for the haemolymph was about 6.6 under normoxic conditions. During exposure to moderate hypoxia, this decreased slightly by virtue of the maintained level of  $\dot{M}_{O_2}$ . With further reduction in  $O_2$  tension, however, this value doubled, since  $\dot{M}_{O_2}$  experienced a larger proportional reduction than  $\dot{V}_b$ .

It was unusual, in view of the hyperventilation observed, to record an initial maintenance and then increase in the percentage extraction of  $O_2$  from the water ventilating the gills at severely hypoxic levels. Measurements showed that the effectiveness of removal of  $O_2$  from the water ( $E_w$ ) was maintained at 63 mmHg but increased at lower inspired  $O_2$  tensions. This may be partially explained by consideration of changes in the ability of the respiratory surface to transfer  $O_2$ . It can be seen from Table 2 that the transfer factor ( $T_{O_2}$ ) increased during progressive hypoxia as  $\dot{M}_{O_2}$  was maintained against reductions in the mean pressure gradient for diffusion of  $O_2$  across the respiratory surface.

The same was not true of the effectiveness of uptake of  $O_2$  into the blood ( $E_b$ ) which exhibited a reduction with progressive hypoxia. It had decreased somewhat at 63 mmHg but the significant reduction occurred at 36 mmHg, when it had fallen to half of its normoxic level, despite the increase in the  $O_2$  affinity of the haemocyanin. At this stage the  $O_2$  tensions recorded in the haemolymph had fallen below the  $P_{satn}$  for the pigment (Fig. 5) and  $a-v$   $O_2$  content difference could no longer be maintained. Thus the drop in  $E_b$  and also  $\dot{V}_b$  explain the eventual reduction in  $O_2$  uptake, despite the observation that the ability of the gas exchange surface to transfer  $O_2$ , and thus  $E_w$ , had improved.

#### DISCUSSION

The present investigation has demonstrated that respiratory gas exchange and acid-base balance in the freshwater crayfish are greatly influenced by variations in the degree of water oxygenation. It was observed that  $\dot{M}_{O_2}$  can be maintained down to an inspired  $O_2$  tension of 50 mmHg at 15 °C. Thereafter  $\dot{M}_{O_2}$ , and presumably long-term survival, is severely limited by further reduction in  $P_{O_2}$ . McMahon *et al.* (1974) noted that in the crayfish *Orconectes virilis* death resulted from prolonged exposure to  $O_2$  tensions below 30 mmHg. This may explain the reported observation that crayfish submerged in shallow water over a shelving bed of gravel respond to a progressive reduction in ambient  $O_2$  by migrating into air (Taylor & Wheatly, 1980). This occurred at a mean  $P_{I,O_2}$  of  $42 \pm 5$  mmHg at 15 °C and enabled them to maintain their  $O_2$  uptake at submerged normoxic levels by utilization of the aerial environment as a source of oxygen.

The response of water-breathing animals to environmental hypoxia is generally to increase branchial ventilation, and this was observed in the crayfish. The ventilatory requirement for water is often inversely proportional to the level of water oxygenation (Dejours, Garey & Rahn, 1970); this holds for conditions of hyperoxia as well as hypoxia (Dejours & Beekenkamp, 1977). Crayfish, like shore crabs (Taylor *et al.* 1977*b*), exhibit the capability of increasing  $\dot{V}_w$  by as much as 2.5–3.0 times the resting level during hypoxia. Butler *et al.* (1978) recorded an increase of 1.2 times in lobsters and McMahon *et al.* (1974) recorded an increase of 5 times in the crayfish *Orconectes*.  $\dot{V}_w$  was enhanced in the crayfish by increasing the overall index of ventilatory activity (cf. Dejours & Beekenkamp, 1977):  $f_R$ , stroke volume and the force of the scaphognathite beat all contributed to the increase in  $\dot{V}_w$ . McMahon *et al.* (1974) recorded a similar response of *Orconectes virilis* to long-term exposure to moderate hypoxia where respiratory frequency and amplitude increased respectively by 1.5 and 3 times the normoxic levels, and there was a 1.3-fold increase in the level of hydrostatic pressure in the branchial chambers.

The present investigation revealed, however, that ventilatory compensations cannot be made when the animals are exposed to more severely hypoxic conditions at  $P_{I,O_2}$  levels below 50 mmHg. It may well be that hyperventilation is expensive in terms of energy costs, and it was observed in the present investigation that  $\dot{M}_{O_2}$  rose as branchial ventilation increased. Presumably, should branchial ventilation be increased beyond a certain limit, the energy cost of ventilation outweighs any respiratory advantage to the animal (Jones, 1971). At this point the animal reduces the level of branchial ventilation at the cost of reduced  $O_2$  uptake. (McMahon *et al.* (1978) found a similar response in *Homarus vulgaris* when exposure to the same level of hypoxia continued for long periods of time, though it was not accompanied by a reduction in  $\dot{M}_{O_2}$ . There is a possibility that changes may occur in the circulatory system during hypoxia, such as improved perfusion of the gills by opening of previously poorly perfused regions, which could explain the increased value for  $T_{O_2}$  during hypoxia and may reduce the requirement for hyperventilation (cf. Randall, 1970).

The situation for the  $O_2$  dependency of heart rate did not follow the pattern evident so far in the other variables. Cardiac frequency decreased approximately in proportion with inspired  $O_2$  tension, reaching a critical level at 70 mmHg. Taylor *et al.* (1973) recorded a similar bradycardia in the shore crab with a comparable  $P_e$  value. Butler *et al.* (1978) observed a maintenance of  $f_H$  in response to hypoxia in the lobster, although cardiac pauses, which are a feature of normal perfusion in this species, disappeared. Therefore it is incorrect to conclude that  $f_H$  was unaffected. McMahon *et al.* (1974) conversely recorded a 50% increase in  $f_H$  in *Orconectes*. However, they considered that this may have been an indirect response arising from the increased muscular effort involved in large increases in branchial pumping.

The critical  $O_2$  tension ( $P_c$ ), below which  $\dot{M}_{O_2}$  decreased with further reduction in  $P_{I,O_2}$ , is the point at which the gas-exchange system fails to continue to provide sufficient  $O_2$  to maintain the normoxic level of aerobic metabolism. The compensatory adjustments that occur during moderate hypoxia represent an attempt to maintain  $\dot{M}_{O_2}$  at the normoxic level by holding arterial  $O_2$  tension at a level close to the shoulder of the  $O_2$  equilibrium curve of the blood pigment, as indicated by the values on Fig. 5. The arterial and venous  $O_2$  tensions recorded are markedly reduced from their

normoxic values. However, the respiratory alkalosis arising from hyperventilation has the effect of shifting the  $O_2$  equilibrium curve to the left, thus increasing the affinity of the blood for  $O_2$ . At an inspired  $O_2$  tension of 63 mmHg the  $P_{a,O_2}$  was 13 mmHg, which provides for 94% saturation of the pigment. However, the further reduction of  $P_{I,O_2}$  to 36 mmHg reduced  $P_{a,O_2}$  to 8 mmHg and caused postbranchial haemolymph to be only 55% saturated (Fig. 5). Therefore an increase in  $O_2$  affinity of the pigment enhances saturation at reduced tensions when compared with pre-hypoxic levels so that content values can be maintained down to moderate levels of hypoxia, but  $O_2$  content eventually falls to critically low levels as the level of hypoxia decreases. Reductions to this level result in reductions in  $E_b$  since the pigment is no longer saturated during its passage through the gills,  $a-v$   $O_2$  content difference is reduced and  $\dot{M}_{O_2}$  unavoidably decreases. The failure to maintain  $O_2$  uptake during severe hypoxia is, therefore, the consequence of a drastic reduction in  $E_b$ .

Hyperventilation, whilst serving to maintain the  $O_2$  supply from depleted water as discussed above, has a far reaching effect on acid-base balance, since facilitation of  $CO_2$  excretion into the water ventilating the gills causes a reduction in  $P_{CO_2}$  and thus an alkalosis in the haemolymph. Pre- and postbranchial haemolymph exhibited an increase in pH of 0.1 unit. Similar changes in pH were recorded by MacMahon *et al.* (1978) during long-term hypoxic stress in the lobster, and by Truchot (1975) in the shore crab. Environmental conditions of hyperoxia have the reverse effect, that is reducing pH and increasing  $P_{CO_2}$ , and again the disturbance is of ventilatory origin (Dejours *et al.* 1970; Dejours & Beekenkamp, 1977). The halving of  $CO_2$  tension values observed in the present investigation with hyperventilation agrees likewise with MacMahon *et al.* (1978) and Truchot (1975). MacMahon *et al.* (1978) also recorded a reduction in blood buffer consequent to the reduction in  $P_{CO_2}$ , but Truchot (1975) reported that the level of  $[HCO_3^- + CO_3^{2-}]$  remained unchanged.

It was found, however, by MacMahon *et al.* (1978) that during long-term hypoxic exposure the hyperventilation was not maintained because it was metabolically expensive. Thus  $P_{CO_2}$  rose so that by 18 h of hypoxic exposure it had reached pre-hypoxic levels. The pH however remained elevated due to a substantial rise in haemolymph bicarbonate concentration. The relatively short duration of the experiments in the present investigation did not allow us to determine whether this mechanism operated in the crayfish.

The respiratory alkalosis observed during hypoxia was partially offset by a metabolic acidosis consequent upon the accumulation of lactate, though this was insufficient to explain the whole of the deviation of the mean values from the buffer line in Fig. 3, as the measured lactate level at a  $P_{O_2}$  of 36 mmHg is equivalent to an acidosis of only 0.025 pH units using the analysis described by Taylor & Wheatly (1981). It has been found by Butler & Taylor (1975) in dogfish, Holeyton & Randall (1967) in trout, and Eddy (1974) in tench that blood pH is unaltered during hypoxia. In these cases it was felt that large increases in blood lactate counteract any tendency towards alkalosis resulting from a rise in  $\dot{V}_w$  (Dejours, 1973). The lactate accumulation observed in the crayfish, although significant, is small in comparison with these more active species, and by virtue of its reduced effect on blood pH does not completely counteract the respiratory alkalosis, which alters the characteristics of the  $O_2$  dissociation curve to the animal's advantage during hypoxia.

The crayfish can maintain aerobic metabolism down to an inspired  $O_2$  tension of 63 mmHg. The animals hyperventilate,  $\dot{V}_b$  is maintained, and thus an increase in the ventilation perfusion ratio is observed, which is generally the physiological response of aquatic gill-breathing animals to hypoxia (Taylor *et al.* 1977*b*). Despite this increase in  $\dot{V}_w$  the percentage of available  $O_2$  extracted on passage through the gills remains approximately constant. A similar result was obtained in the crayfish *Procambarus* by Larimer (1961), and the shore crab (Taylor *et al.* 1977*b*). This was true also of *Homarus*, since Butler *et al.* (1978) recorded that percentage extraction was unchanged during hypoxia. A. C. Taylor (1976) working on *Carcinus* reported that percentage extraction from water decreased during hypoxia, which is generally the case in fish (Hughes & Shelton, 1962), though the crabs may have been disturbed in these experiments, as was suggested by Taylor *et al.* (1977*b*). The convection requirement for the water increases by virtue of hyperventilation: this agrees with the observation of Dejours *et al.* (1970) that the ventilatory requirement is inversely related to the water oxygenation.

When more severe hypoxia was induced, the ventilation perfusion ratio fell slightly though it was still maintained above the pre-hypoxic level. Percentage extraction and  $E_w$  exhibited an increase at this stage. The only explanation for this and the previous observation that percentage extraction and  $E_w$  are maintained during hyperventilation in hypoxic water is that the respiratory surface improves its capabilities to transfer  $O_2$ , as described for the trout by Høleton & Randall (1967). This conclusion is borne out by the values for transfer factor in the crayfish, which increased during hypoxia, because  $\dot{M}_{O_2}$  was maintained in spite of a reduction in mean pressure for diffusion of  $O_2$ . Both the convection requirement for the haemolymph and  $E_b$  are maintained relatively constant in moderate hypoxia.

When these observed responses to environmental hypoxia are viewed in the context of the overall behavioural responses of the animal, the respiratory role of the migration into air emerges. Firstly we see that at  $P_{O_2}$  levels below 50 mmHg,  $\dot{M}_{O_2}$  will eventually become limited, and that migration of the animal into air anticipates this problem and serves to maintain  $\dot{M}_{O_2}$  and  $f_H$  at their pre-hypoxic levels (Taylor & Wheatly, 1980). When this migration occurs blood pH will be alkalotic due to the effects of hyperventilation, and thus the extent of the change to relative acidosis inherent in the initial period of air breathing must be greater than was described by Taylor & Wheatly (1981). In air, ventilation rate ( $\dot{V}_{a1r}$ ) was only 5% of normoxic  $\dot{V}_w$  or approximately 2% of hypoxic  $\dot{V}_w$ , so that the saving on the energy cost of ventilation associated with migration into air will be large.

This attempt to describe the physiological response of the crayfish *Autopotamobius pallipes* to progressive hypoxia thus gives credibility to the behavioural migration on to land, which occurs at a  $P_{O_2}$  close to the  $P_5$  for  $\dot{M}_{O_2}$ , and thus enables the animal to avoid a reduction in metabolic rate during hypoxia. When denied access to air at  $P_{I,O_2}$  levels below 40 mmHg, the crayfish resorts to anaerobiosis and lactic acid accumulates in the haemolymph. Using the simple assumptions described by Taylor & Wheatly (1981) it is possible to deduce that ATP production by lactic fermentation replaces approximately 10% of that lost due to the reduction in  $\dot{M}_{O_2}$  below 40 mmHg. It seems possible that some other acid-end product of anaerobiosis may accumulate in the crayfish during hypoxia to make up this shortfall and also to explain the

marked deviation from the buffer line in Fig. 3. A similar choice between anaerobiosis or the exploitation of air as a source of oxygen when submerged in hypoxic water is presented by the emersion response in the shore crab, *Carcinus maenas* (Taylor & Butler, 1973; Taylor *et al.* 1977b).

This work was supported by a Science Research Council grant to E. W. T. and took place during the tenure of a S.R.C. studentship held by M. G. W.

## REFERENCES

- AMBERSON, W. R., MAYERSON, H. S. & SCOTT, W. J. (1924). The influence of oxygen tension upon metabolic rate in invertebrates. *J. gen. Physiol.* **7**, 171-176.
- ARUDPRAGASAM, K. D. & NAYLOR, E. (1964). Gill ventilation volumes, oxygen consumption and respiratory rhythm in *Carcinus maenas* (L.) *J. exp. Biol.* **41**, 309-321.
- BUTLER, P. J. & TAYLOR, E. W. (1975). The effect of progressive hypoxia on respiration in the dogfish (*Scyliorhinus canicula*) at different seasonal temperatures. *J. exp. Biol.* **63**, 117-130.
- BUTLER, P. J., TAYLOR, E. W. & McMAHON, B. R. (1978). Respiratory and circulatory changes in the lobster (*Homarus vulgaris*) during long-term exposure to moderate hypoxia (*J. exp. Biol.* **73**, 131-146).
- DEJOURS, P. (1973). Problems of control of breathing in fishes. In *comparative Physiology* (ed. L. Bolis, K. Schmidt-Nielsen and S. H. P. Madrell), pp. 117-133. Amsterdam: North-Holland.
- DEJOURS, P. & BEEKENKAMP, H. (1977). Crayfish respiration as a function of water oxygenation. *Respir. Physiol.* **30**, 241-251.
- DEJOURS, P., GAREY, W. F. & RAHN, H. (1970). Comparison of ventilatory and circulatory flow rates between animals in various physiological conditions. *Respir. Physiol.* **9**, 108-117.
- EDDY, F. B. (1974). Blood gases of the tench (*Tinca tinca*) in well-aerated and oxygen-deficient waters. *J. exp. Biol.* **60**, 71-83.
- FOX, H. M. & JOHNSON, M. L. (1934). The control of respiratory movements in crustaceans by carbon dioxide. *J. exp. Biol.* **11**, 1-10.
- HILL, R. W. (1976). *Comparative Animal Physiology: An Environmental Approach*. London: Harper and Row.
- HOLETON, G. F. & RANDALL, D. J. (1967). The effect of hypoxia upon the partial pressure of gases in the blood and water afferent and efferent to the gills of rainbow trout. *J. exp. Biol.* **46**, 317-327.
- HUGHES, G. M. & SHELTON, G. (1962). Respiratory mechanisms and their nervous control in fish. *Adv. comp. Physiol. Biochem.* **1**, 275-364.
- JOHANSEN, K., LENFANT, C. & MECKLENBERG, T. (1970). Respiration in the crab, *Cancer magister*. *Z. vergl. Physiol.* **70**, (1), 1-9.
- JONES, D. R. (1971). Theoretical analysis of factors which may limit the maximum oxygen uptake of fish: the oxygen cost of the cardiac and branchial pumps. *J. theor. Biol.* **32**, 341-349.
- LARIMER, J. L. (1961). Measurements of ventilation volume in decapod crustaceans. *Physiol. Zool.* **34**, 158-166.
- LARIMER, J. L. & GOLD, A. H. (1961). Responses of the crayfish, *Procambarus simulans* to respiratory stress. *Physiol. Zool.* **134**, 167-176.
- LINDROTH, A. (1938). Atmungsregulation bei *Astacus fluviatilis*. *Ark. Zool.* **20**, 1-7.
- McMAHON, B. R., BURGREN, W. W. & WILKENS, J. L. (1974). Respiratory responses to long-term hypoxic stress in the crayfish *Orconectes virilis*. *J. exp. Biol.* **60**, 195-206.
- McMAHON, B. R., BUTLER, P. J. & TAYLOR, E. W. (1978). Acid-base changes during recovery from disturbance and during long-term hypoxic exposure in the lobster *Homarus vulgaris*. *J. exp. Zool.* **205** (3), 361-370.
- RANDALL, D. J. (1970). The circulatory system. In *Fish Physiology*, vol. iv (ed. W. S. Hoar and D. J. Randall), pp. 133-182. London: Academic Press.
- SHORT, S., TAYLOR, E. W. & BUTLER, P. J. (1979). The effectiveness of oxygen transfer during normoxia and hypoxia in the dogfish (*Scyliorhinus canicula* L.) before and after cardiac vagotomy. *J. comp. Physiol.* **132**, 289-295.
- SPITZER, R. W., MARVIN, D. E. & HEATH, A. G. (1969). The effect of temperature on the respiratory and cardiac response of the bluegill sunfish to hypoxia. *Comp. Biochem. Physiol.* **30**, 83-90.
- SPOEK, G. L. (1974). The relationship between blood haemocyanin level, oxygen uptake and the heart-beat and scaphognathite-beat frequencies in the lobster *Homarus gammarus*. *Neth. J. Sea Res.* **8**, 1-26.
- TAYLOR, A. C. (1976). The respiratory responses of *Carcinus maenas* to declining oxygen tension. *J. exp. Biol.* **65**, 309-322.



- TAYLOR, E. W. & BUTLER, P. J. (1973). The behaviour and physiological responses of the shore crab *Carcinus maenas* (L.) during changes in environmental oxygen tension. *Neth. J. Sea Res.* **7**, 497-505.
- TAYLOR, E. W. & BUTLER, P. J. (1978). Aquatic and aerial respiration in the shore crab, *Carcinus maenas* (L.) acclimated to 15 °C. *J. comp. Physiol.* **127**, 315-323.
- TAYLOR, E. W., BUTLER, P. J. & AL-WASSIA, A. (1977a). The effect of a decrease in salinity on respiration, osmoregulation and activity in the shore crab, *Carcinus maenas* (L.) at different acclimation temperatures. *J. comp. Physiol.* **119**, 155-170.
- TAYLOR, E. W., BUTLER, P. J. & AL-WASSIA, A. (1977b). Some responses of the shore crab *Carcinus maenas* (L.) to progressive hypoxia at different acclimation temperatures and salinities. *J. comp. Physiol.* **122**, 391-402.
- TAYLOR, E. W., BUTLER, P. J. & SHERLOCK, P. J. (1973). The respiratory and cardiovascular changes associated with the emersion response of *Carcinus maenas* (L.) during environmental hypoxia at three different temperatures. *J. comp. Physiol.* **86**, 95-115.
- TAYLOR, E. W. & WHEATLY, M. G. (1979). The behaviour and respiratory physiology of the shore crab, *Carcinus maenas* (L.) at moderately high temperatures. *J. comp. Physiol.* **130**, 309-316.
- TAYLOR, E. W. & WHEATLY, M. G. (1980). Ventilation, heart rate and respiratory gas exchange in the crayfish *Austropotamobius pallipes* (Lereboullet) submerged in normoxic water and following 3 h exposure in air at 15 °C. *J. comp. Physiol.* **138**, 67-78.
- TAYLOR, E. W. & WHEATLY, M. G. (1981). The effect of long-term aerial exposure on heart rate, ventilation, respiratory gas exchange and acid-base status in the crayfish *Austropotamobius pallipes*. *J. exp. Biol.* (In the Press.)
- THOMAS, H. J. (1954). The oxygen uptake of the lobster (*Homarus vulgaris* Edw.). *J. exp. Biol.* **31**, 228-251.
- TRUCHOT, J.-P. (1975). Changements de l'état acide-base du sang en fonction de l'oxygénation de l'eau chez le crab (*Carcinus maenas* (L.)). *J. Physiol. (Paris)* **70**, 583-592.
- WIENS, A. W. & ARMITAGE, H. B. (1961). The oxygen consumption of the crayfish *Orconectes immunis* and *Orconectes nais* in response to temperature and oxygen saturation. *Physiol. Zool.* **34**, 39-54.
- WINGET, R. R. (1969). Oxygen consumption and respiratory energetics in the spiny lobster, *Panulirus interruptus*. *Biol. Bull. Mar. Biol. Lab., Woods Hole*. **136**, 301-12.
